# Supplementary material
Source: Springer Nature journal article supplement (https://www.springermedizin.de/resource/supplementary/12933_2011_358_MOESM1_ESM.pdf/9538236)

A. Death From Total CVD

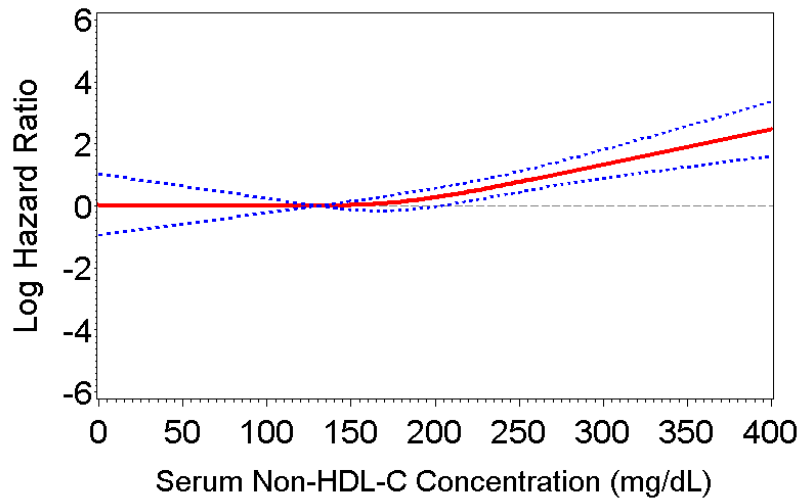

B. Death From IHD

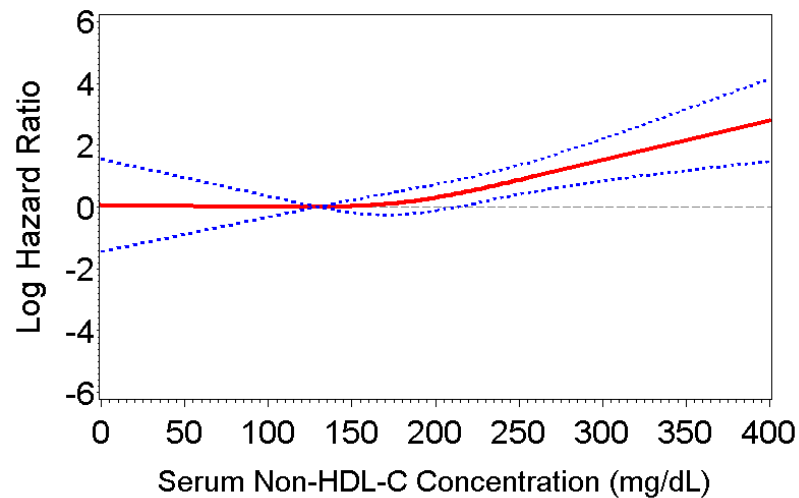

C. Death From Stroke

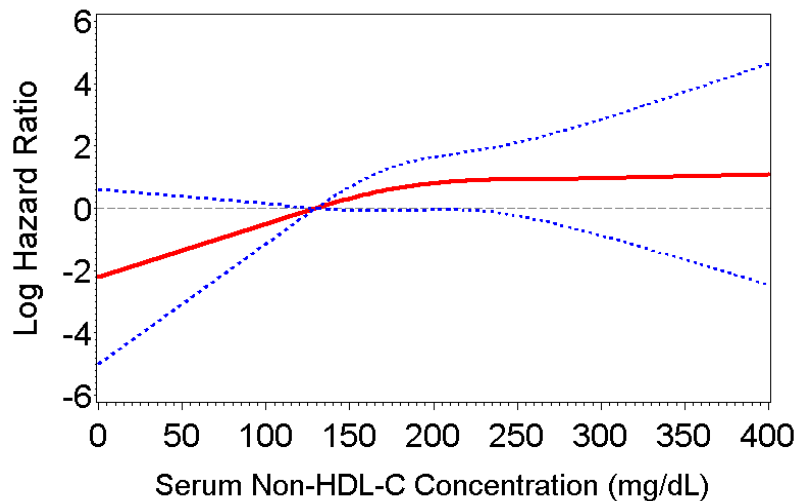

D. Death From Other CVD

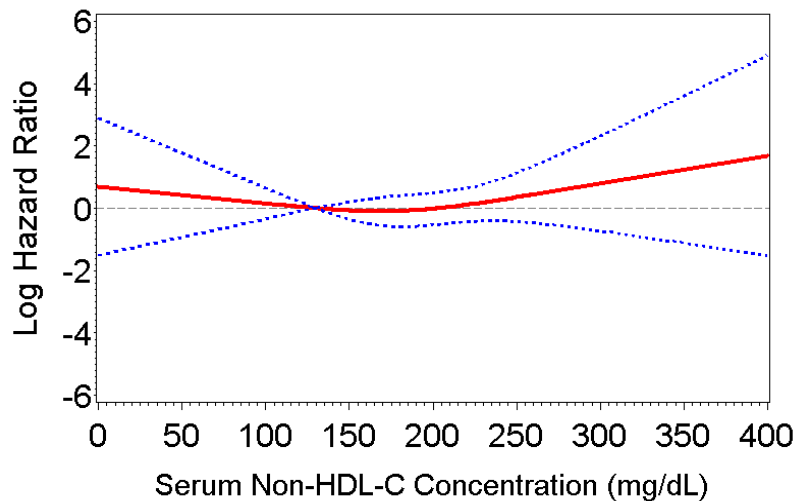

Supplement: MOESM1 [file 9538236]
